# Supplementary material
Source: publisher figshare collection journal article supplement (https://tandf.figshare.com/ndownloader/files/17819843)
Supplement: Supplementary file 1 [file 17819843]

Supplemental online material

This table shows the sets of stimulus pairs that were used in the experiment. Stimulus pairs were created using pictures from Snodgrass and Vanderwart (1980) and words from the ANEW database (Bradley & Lang, 1999).

| **Set** | **Subset** | **Picture** | **Word** | **Valence** |
| --- | --- | --- | --- | --- |
| A | A1 | Deer | Moody | Negative |
| A | A1 | Scissors | Handicap | Negative |
| A | A1 | Umbrella | Death | Negative |
| A | A1 | Bread | Stupid | Negative |
| A | A1 | Turtle | Coward | Negative |
| A | A1 | Raccoon | Inferior | Negative |
| A | A1 | Bird | Scar | Negative |
| A | A1 | Butterfly | Fat | Negative |
| A | A1 | Hat | Coarse | Neutral |
| A | A1 | Penguin | Material | Neutral |
| A | A1 | Envelope | Stiff | Neutral |
| A | A1 | Grapes | Corner | Neutral |
| A | A1 | Nail | Shy | Neutral |
| A | A1 | Key | Custom | Neutral |
| A | A1 | Paintbrush | Excuse | Neutral |
| A | A1 | Tie | Corridor | Neutral |
| A | A1 | Ashtray | Useful | Positive |
| A | A1 | Trumpet | Carefree | Positive |
| A | A1 | Lettuce | Beauty | Positive |
| A | A1 | Boot | Rainbow | Positive |
| A | A1 | Knife | Politeness | Positive |
| A | A1 | Piano | Safe | Positive |
| A | A1 | Gorilla | Ocean | Positive |
| A | A1 | Accordion | Hug | Positive |
| A | A2 | Heart | Dead | Negative |
| A | A2 | Chicken | Trash | Negative |
| A | A2 | Lightbulb | Obesity | Negative |
| A | A2 | Camera | Discomfort | Negative |
| A | A2 | Paddle | Slum | Negative |
| A | A2 | Cake | Lost | Negative |
| A | A2 | Thumb | Gloom | Negative |
| A | A2 | Shirt | Blind | Negative |
| A | A2 | Elephant | Context | Neutral |
| A | A2 | Snake | Trumpet | Neutral |
| A | A2 | Carrot | Blase | Neutral |
| A | A2 | Broom | Errand | Neutral |
| A | A2 | Cat | Odd | Neutral |
| A | A2 | Television | Board | Neutral |
| A | A2 | Leaf | Medicine | Neutral |
| A | A2 | Tree | Alley | Neutral |
| A | A2 | Lamp | Friend | Positive |
| A | A2 | Rabbit | Wise | Positive |
| A | A2 | Chair | Breeze | Positive |
| A | A2 | Ladder | Comfort | Positive |
| A | A2 | Bed | Bird | Positive |
| A | A2 | Desk | Gentle | Positive |
| A | A2 | Pineapple | Music | Positive |
| A | A2 | Guitar | Snuggle | Positive |
| B | B1 | Fork | Grief | Negative |
| B | B1 | Artichoke | Fault | Negative |
| B | B1 | Clock | Cut | Negative |
| B | B1 | Watch | Impair | Negative |
| B | B1 | Apple | Failure | Negative |
| B | B1 | Glasses | Sick | Negative |
| B | B1 | Fish | Fever | Negative |
| B | B1 | Sled | Stink | Negative |
| B | B1 | Cup | Muddy | Neutral |
| B | B1 | Cherry | Cannon | Neutral |
| B | B1 | Flower | Spray | Neutral |
| B | B1 | Sandwich | Privacy | Neutral |
| B | B1 | Frog | Tower | Neutral |
| B | B1 | Duck | Patient | Neutral |
| B | B1 | Telephone | Black | Neutral |
| B | B1 | House | Habit | Neutral |
| B | B1 | Lipstick | Luxury | Positive |
| B | B1 | Present | Elegant | Positive |
| B | B1 | Axe | Bless | Positive |
| B | B1 | Microphone | Dream | Positive |
| B | B1 | Frying Pan | Nature | Positive |
| B | B1 | Mouse | Grateful | Positive |
| B | B1 | Drum | Food | Positive |
| B | B1 | Rope | Pillow | Positive |
| B | B2 | Spider | Messy | Negative |
| B | B2 | Doll | Dummy | Negative |
| B | B2 | Traffic light | Unhappy | Negative |
| B | B2 | Eye | Alone | Negative |
| B | B2 | Ear | Illness | Negative |
| B | B2 | Pig | Waste | Negative |
| B | B2 | Table | Sad | Negative |
| B | B2 | Lock | Cemetery | Negative |
| B | B2 | Shoe | Gender | Neutral |
| B | B2 | Bell | Passage | Neutral |
| B | B2 | Basket | Obey | Neutral |
| B | B2 | Hand | Dark | Neutral |
| B | B2 | Rake | Rock | Neutral |
| B | B2 | Baby Carriage | Aloof | Neutral |
| B | B2 | Snowman | Sheltered | Neutral |
| B | B2 | Nose | Writer | Neutral |
| B | B2 | Window | Reward | Positive |
| B | B2 | Watering can | Bath | Positive |
| B | B2 | Anchor | Protected | Positive |
| B | B2 | Hammer | Warmth | Positive |
| B | B2 | Acorn | Sky | Positive |
| B | B2 | Dog | Satisfied | Positive |
| B | B2 | Church | Secure | Positive |
| B | B2 | Spoon | Soft | Positive |
| *Note.* Sets A and B were counterbalanced as filler or critical pairs. When set A or B served as critical pairs, subsets (A1, A2 and B1, B2) were counterbalanced as preserved and critical pairs. | | | | |
